# Supplementary material for: In-plane β-Co(OH)2/Co3O4hybrid nanosheets for flexible all-solid-state thin-film supercapacitors with high electrochemical performance
Source: Royal Society of Chemistry journal article supplement (doi:10.1039/d0nr06208a), 2020-01-01
Supplement: d0nr06208a1.pdf [file d0nr06208a1.pdf]

## **Electronic Supplementary Information**

### **In-plane $\beta$ -Co(OH)<sub>2</sub>/Co<sub>3</sub>O<sub>4</sub> hybrid nanosheets for flexible all-solid-state thin-film supercapacitors with high electrochemical performance**

Shanshan Lou,<sup>+</sup> Xueying Yang,<sup>+</sup> Pin Hao, Fengcai Lei, Junfeng Xie\* and Bo Tang\*

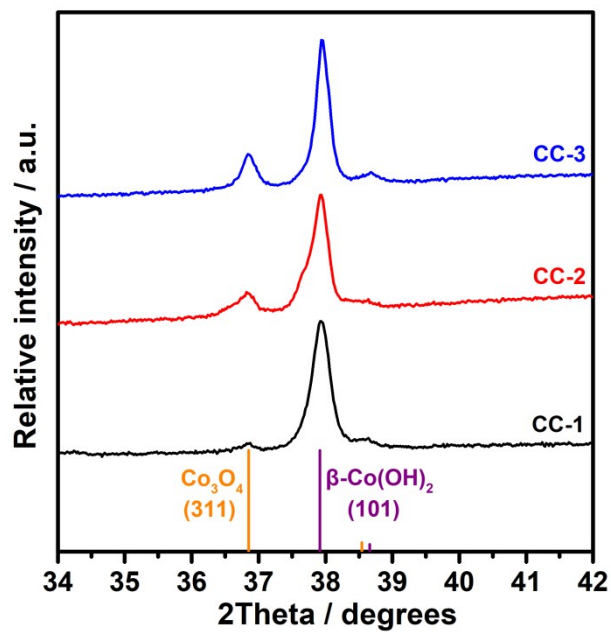

**Fig. S1** Enlarged XRD patterns of the products to identify the intensity ratio of (311) diffraction peak of  $\text{Co}_3\text{O}_4$  to (101) diffraction peak of  $\beta\text{-Co(OH)}_2$ .

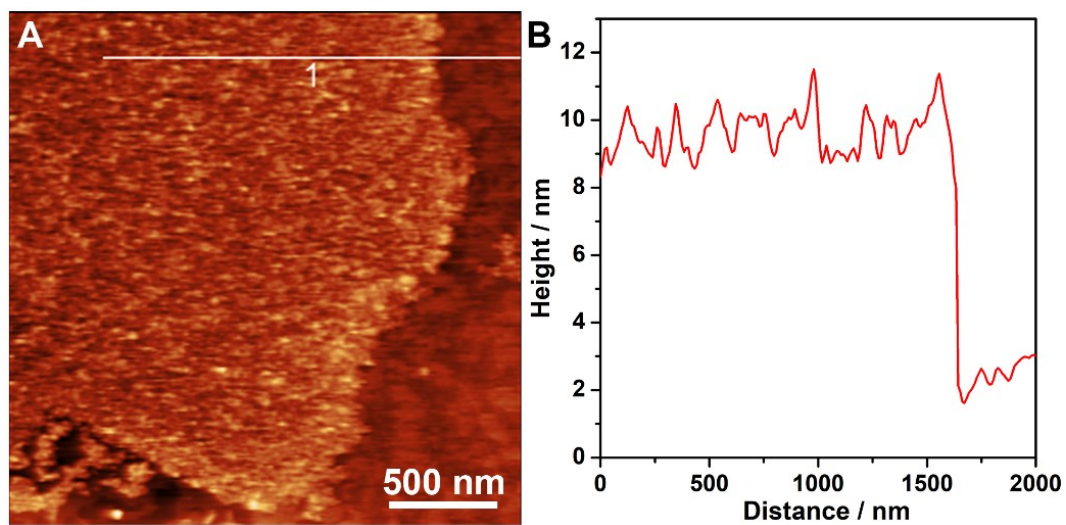

**Fig. S2** (A) AFM image and (B) height profile plot of CC-2.

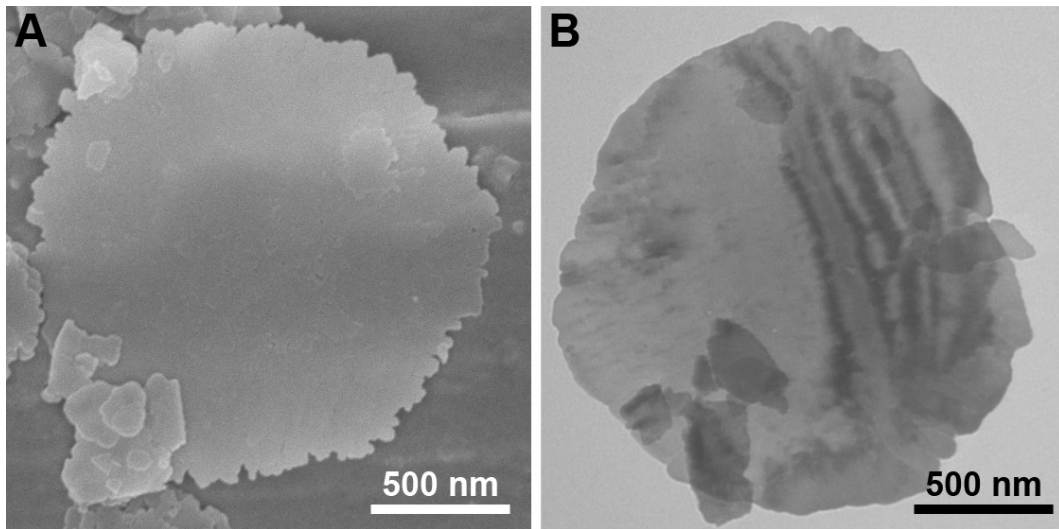

**Fig. S3** (A) SEM and (B) TEM image of the  $\beta\text{-Co(OH)}_2/\text{Co}_3\text{O}_4$  hybrid nanosheets synthesized at 80 °C for 6 hours (CC-1).

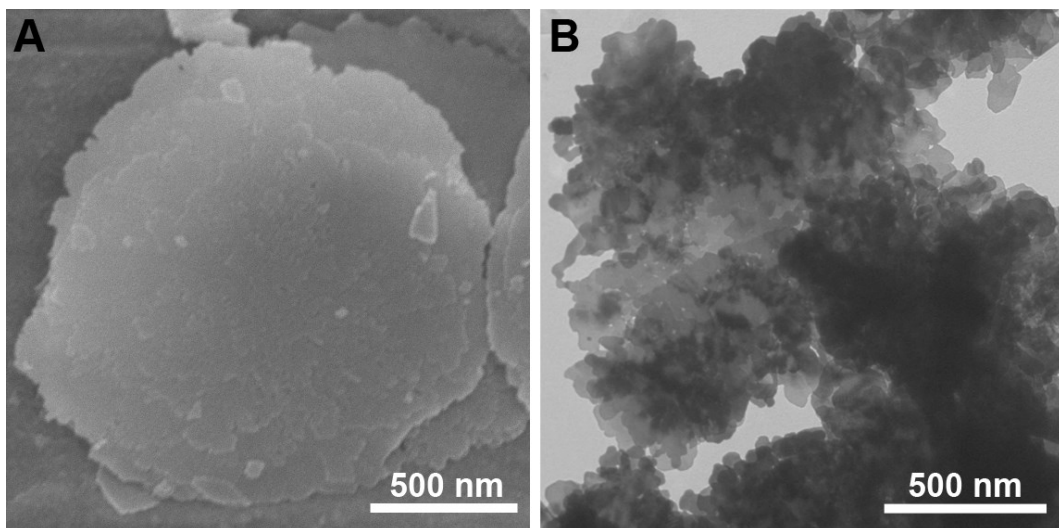

**Fig. S4** (A) SEM and (B) TEM image of the  $\beta\text{-Co(OH)}_2/\text{Co}_3\text{O}_4$  hybrid nanosheets synthesized at 120 °C for 12 hours (CC-3).

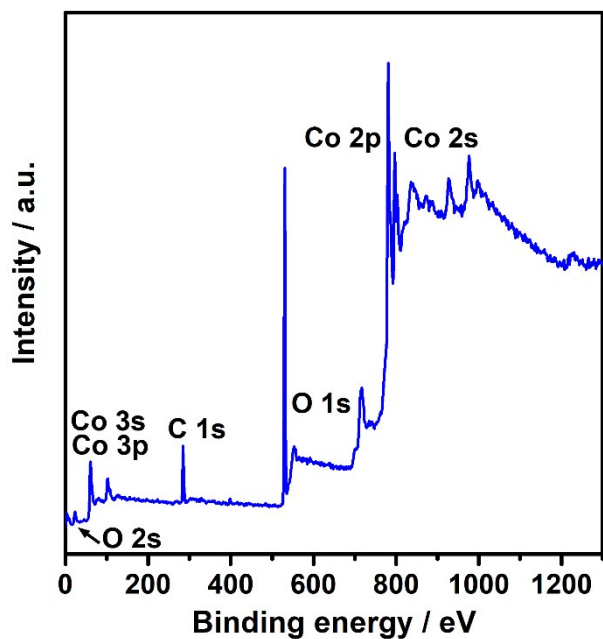

**Fig. S5** XPS survey spectrum of CC-2 confirms the compositional purity.

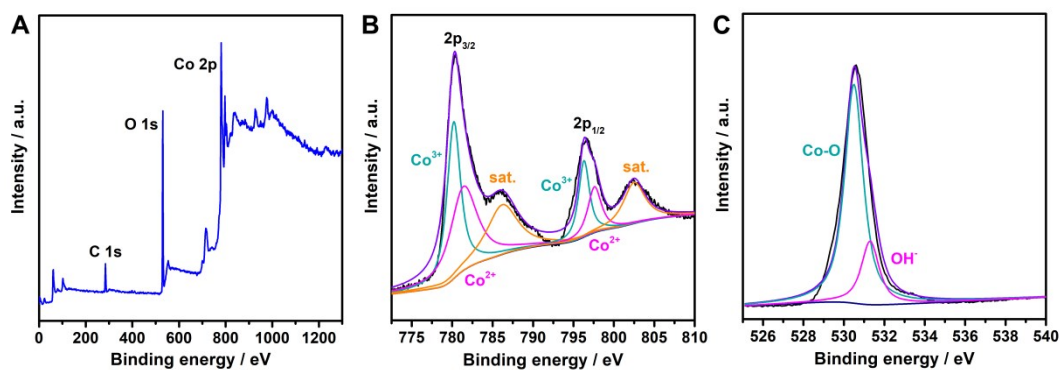

**Fig. S6** XPS data of CC-1. (A) XPS survey spectrum. (B) Co 2p spectrum. (B) O 1s spectrum.

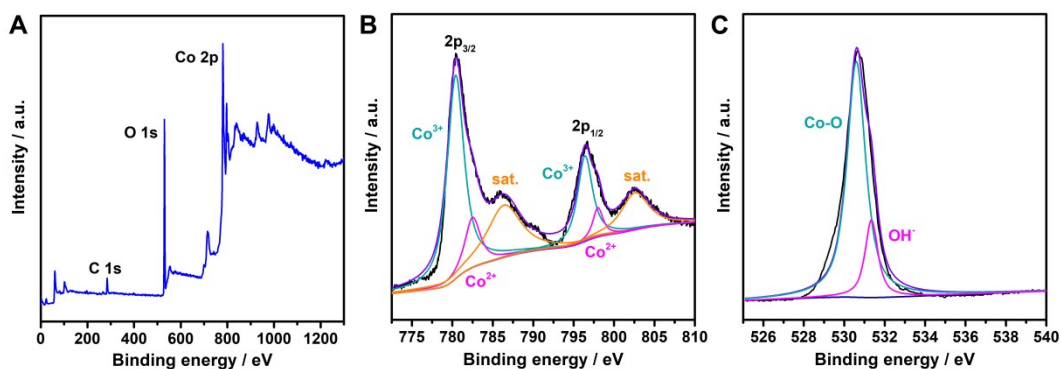

**Fig. S7** XPS data of CC-3. (A) XPS survey spectrum. (B) Co 2p spectrum. (B) O 1s spectrum.

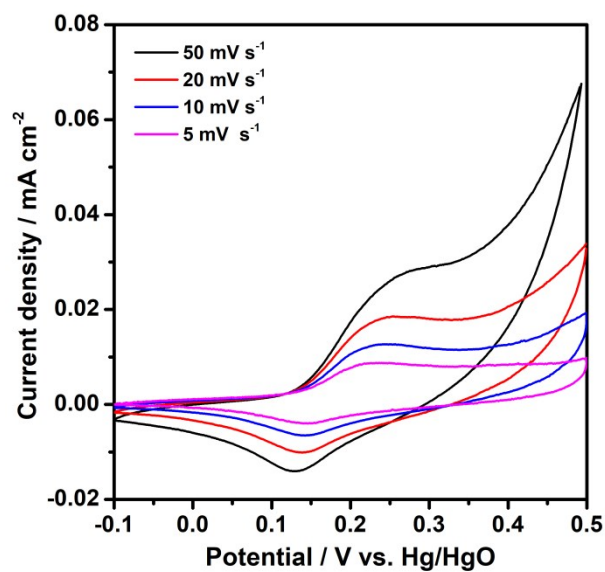

**Fig. S8** CV curves of CC-1 at various scan rates.

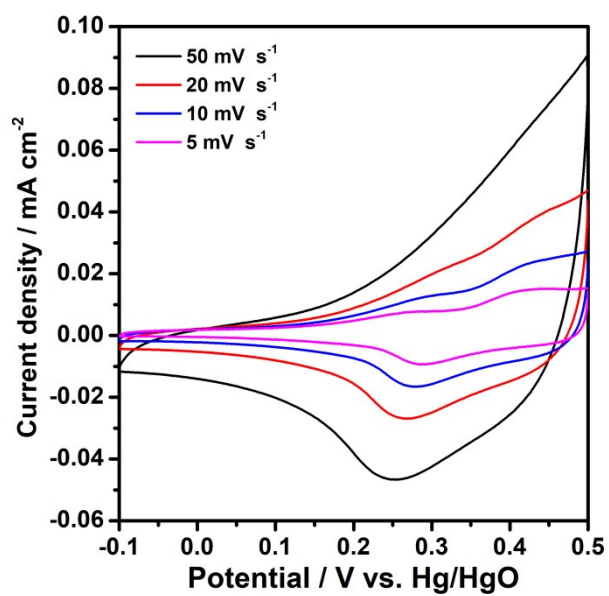

**Fig. S9** CV curves of CC-2 at various scan rates.

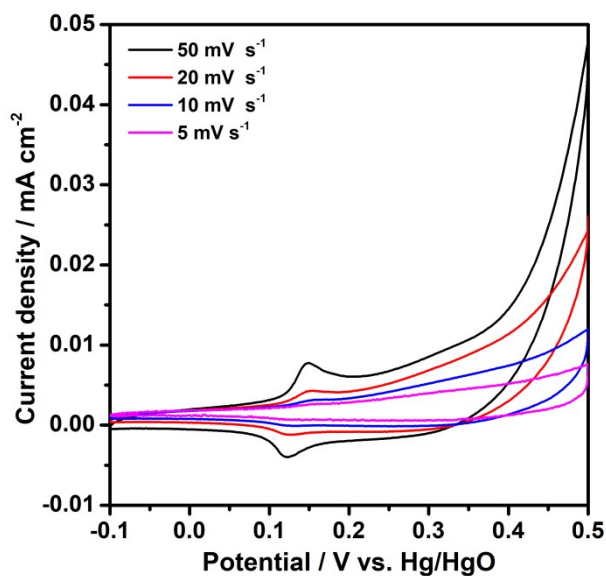

**Fig. S10** CV curves of CC-3 at various scan rates.

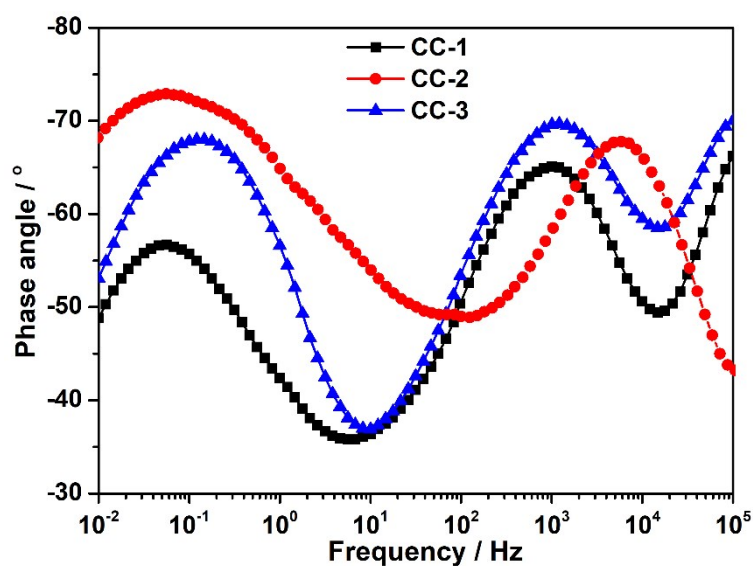

**Fig. S11** Bode phase angle plot of the in-plane  $\beta$ -Co(OH)<sub>2</sub>/Co<sub>3</sub>O<sub>4</sub> hybrid nanosheets obtained open-circuit potentials. The phase angle of CC-2 is measured to be close to 73 at low frequency domain, further confirming the excellent capacitive behavior of the  $\beta$ -Co(OH)<sub>2</sub>/Co<sub>3</sub>O<sub>4</sub> hybrid nanosheets

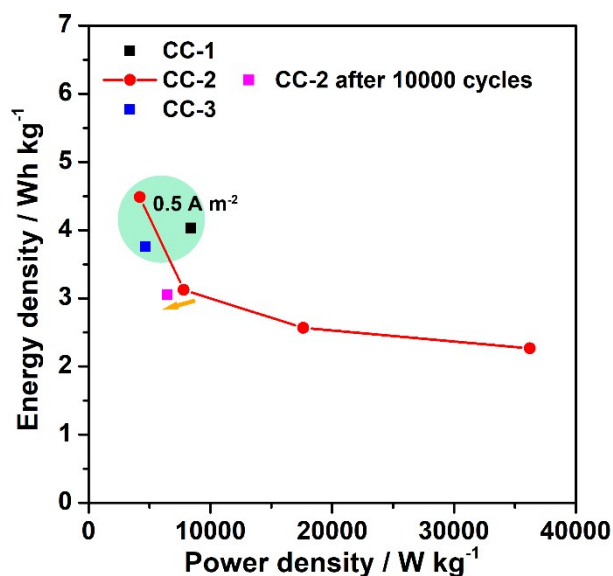

**Fig. S12** Ragone plot of the as-fabricated ASSTFSs based on CC-1, CC-2 and CC-3. The energy density and power density of the CC-2-based ASSTFS display only slight degradation even after 10000 cycles, further confirming the superior stability of the CC-2-based ASSTFS device.

**Table S1** Comparison of the electrochemical performance of the all-solid-state supercapacitors.

| Material                                          | Specific capacitance @ 100 mV s <sup>-1</sup> | Specific capacitance @ 0.5 A m <sup>-2</sup> | Parameters of the device                                            | Reference |
|---------------------------------------------------|-----------------------------------------------|----------------------------------------------|---------------------------------------------------------------------|-----------|
| CC-1                                              | 166.3 F g <sup>-1</sup>                       | 80.6 F g <sup>-1</sup>                       | PVA/KOH                                                             | this work |
| CC-2                                              | 232.9 F g <sup>-1</sup>                       | 89.7 F g <sup>-1</sup>                       | PVA/KOH                                                             | this work |
| CC-2 after activation                             | 289.1 F g <sup>-1</sup>                       | -                                            | PVA/KOH                                                             | this work |
| CC-3                                              | 211.7 F g <sup>-1</sup>                       | 75.2 F g <sup>-1</sup>                       | PVA/KOH                                                             | this work |
| $\beta$ -Ni(OH) <sub>2</sub> /graphene nanohybrid | -                                             | ~0.5 F g <sup>-1</sup>                       | thickness=50 nm, 1 cm <sup>2</sup> , PVA/ KOH                       | 1         |
| N,B-doped graphene                                | 26.2 F g <sup>-1</sup>                        | -                                            | thickness=1 mm, $\Phi$ =7-10 mm, PVA/H <sub>2</sub> SO <sub>4</sub> | 2         |
| N-doped graphene                                  | 21.7 F g <sup>-1</sup>                        | -                                            | thickness=1 mm, $\Phi$ =7-10 mm, PVA/H <sub>2</sub> SO <sub>4</sub> | 2         |
| B-doped graphene                                  | 21.3 F g <sup>-1</sup>                        | -                                            | thickness=1 mm, $\Phi$ =7-10 mm, PVA/H <sub>2</sub> SO <sub>4</sub> | 2         |
| graphene paper                                    | 6.5 F g <sup>-1</sup>                         | -                                            | thickness=1 mm,                                                     | 2         |

|                                                                                                              |                        |                         |                                                                          |   |
|--------------------------------------------------------------------------------------------------------------|------------------------|-------------------------|--------------------------------------------------------------------------|---|
|                                                                                                              |                        |                         | $\Phi=7-10$ mm,<br>PVA/H <sub>2</sub> SO <sub>4</sub>                    |   |
| <b>graphene</b>                                                                                              | 21.2 F g <sup>-1</sup> | -                       | thickness=1 mm,<br>$\Phi=7-10$ mm,<br>PVA/H <sub>2</sub> SO <sub>4</sub> | 2 |
| <b>Co(CO<sub>3</sub>)<sub>0.5</sub>(OH)<br/>/Ni<sub>2</sub>(CO<sub>3</sub>)(OH)<sub>2</sub><br/>nanobelt</b> | -                      | 72.5 F g <sup>-1</sup>  | acetylene black/<br>/PVDF/NF,<br>PVA/KOH                                 | 3 |
| <b>NiMoO<sub>4</sub>-PANI</b>                                                                                | -                      | 74.2 F g <sup>-1</sup>  | acetylene black/<br>/PVDF/NF,<br>PVA/KOH                                 | 4 |
| <b>Ag nanoparticles/<br/>activated carbon/<br/>woven polyester</b>                                           | 17.8 F g <sup>-1</sup> | -                       | PVA/H <sub>2</sub> SO <sub>4</sub>                                       | 5 |
| <b>NiO nanosheets/ NF<br/>//<math>\alpha</math>-Fe<sub>2</sub>O<sub>3</sub><br/>nanorods/CC</b>              | -                      | ~50.0 F g <sup>-1</sup> | thickness=0.12 mm,<br>PVA/KOH                                            | 6 |

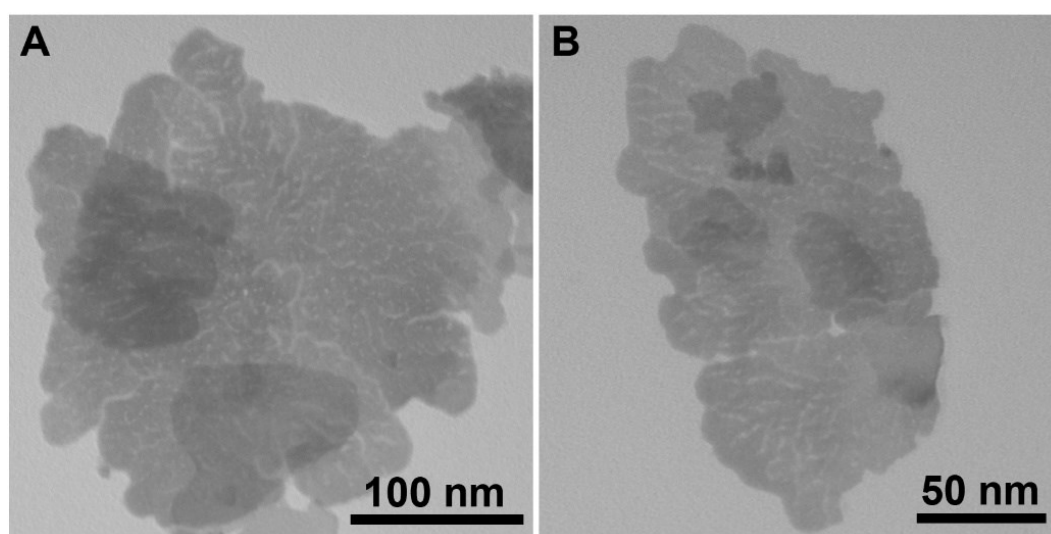

**Fig. S13** TEM images of CC-2 hybrid nanosheets after conducting 10000 cycles. As can be seen, more cracks were generated during the activation process, and the surface of the  $\beta$ -Co(OH)<sub>2</sub>/Co<sub>3</sub>O<sub>4</sub> hybrid nanosheets is obviously roughened owing to the repeated surface redox reaction, therefore leading to the exposure of more surface sites for the pseudocapacitive charge storage and thus exhibiting significantly improved performance.

## Reference



1. J. Xie, X. Sun, N. Zhang, K. Xu, M. Zhou, Y. Xie, *Nano Energy*. 2013, **2**, 65-74.
2. Z.-S. Wu, A. Winter, L. Chen, Y. Sun, A. Turchanin, X. Feng, K. Müllen, *Adv. Mater.* 2012, **24**, 5130-5135.
3. G. Zhang, P. Qin, R. Nasser, S. Li, P. Chen, J. Song, *Chem. Eng. J.* 2020, **387**, 124029.
4. H. Gao, F. Wu, X. Wang, C. Hao, C. Ge, *Int. J. Hydrogen Energy* 2018, **43**, 18349-18362.
5. Y. Jang, J. Jo, K. Woo, S.-H. Lee, S. Kwon, K.-Y. Kim, D. Kang, *Appl. Phys. Lett.* 2017, **110**, 203902.
6. S. Zhang, B. Yin, Z. Wang, F. Peter, *Chem. Eng. J.* 2016, **306**, 193-203.
